# Supplementary material
Source: PubMed Central journal article supplement (PMC4256876)
Supplement: supp_pp.114.246421_246421suppdata.pdf [file supp_pp.114.246421_246421suppdata.pdf]

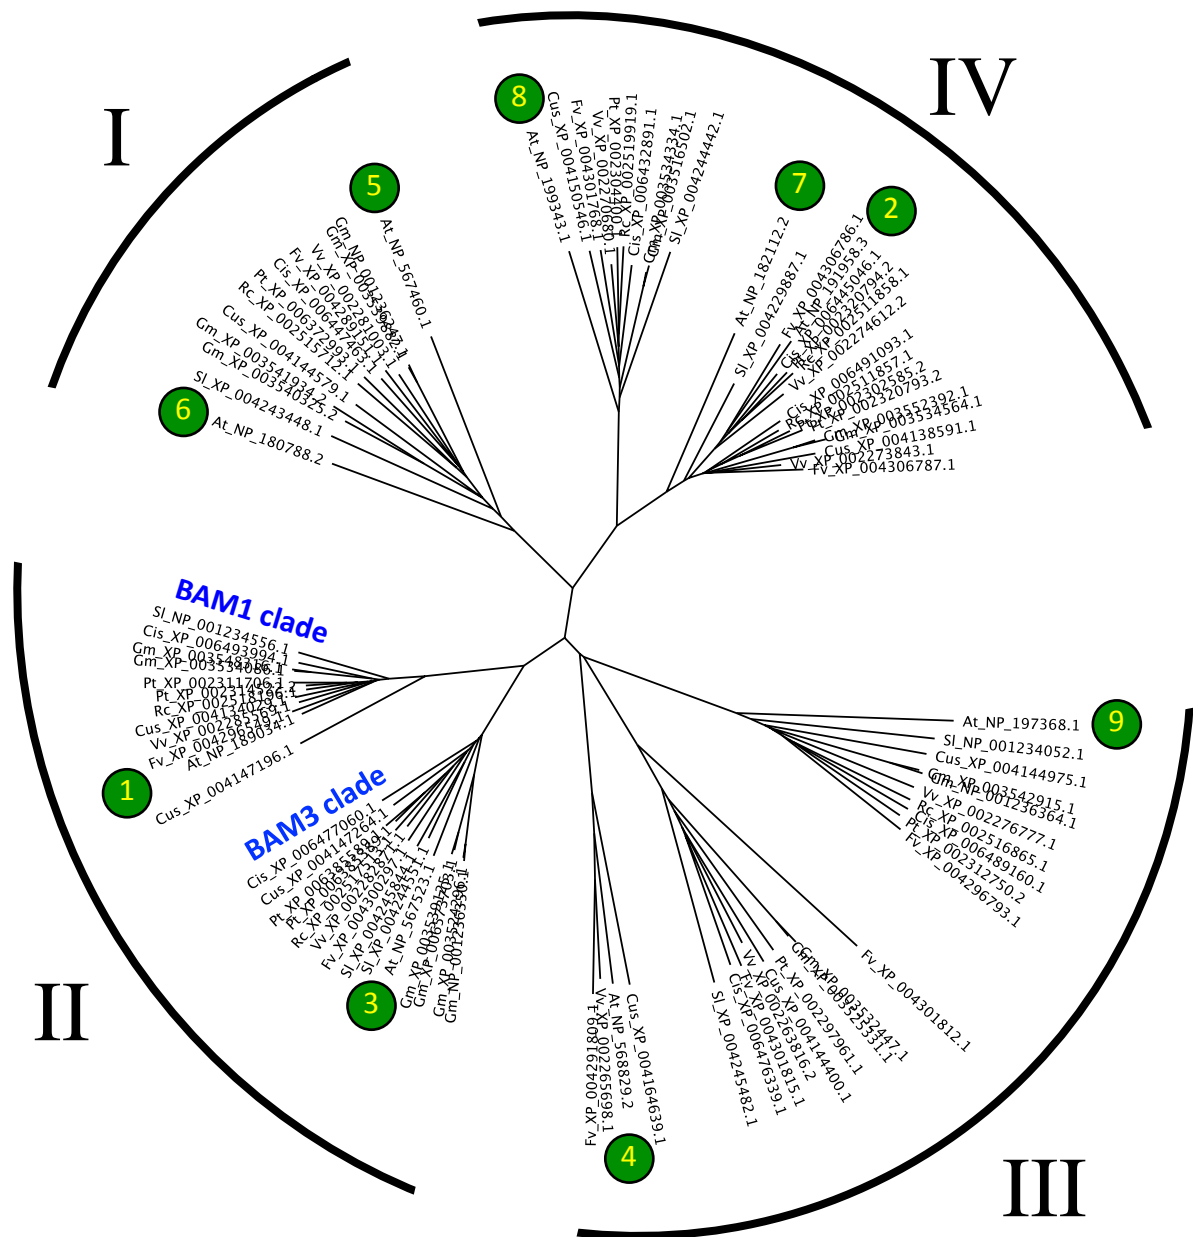

**Supplemental Figure S1.** Radial phylogenetic tree based on an alignment of the  $\beta$ -amylase catalytic domains from all of the complete BAM sequences in nine Eudicot genomes: *Arabidopsis thaliana*, *Populus trichocarpa*, *Vitis vineifera*, *Ricinus communis*, *Fragaria vesca*, *Citrus sinensis*, *Cucumis sativus*, *Glycine max*, and *Solanum lycopersicum*. The variable N-terminal sequences were removed up to the first highly conserved residue; Val13 of Arabidopsis BAM5. Four subfamilies were identified by Fulton et al. (2008). Arabidopsis BAM1 through BAM9 are labeled with circled numbers.

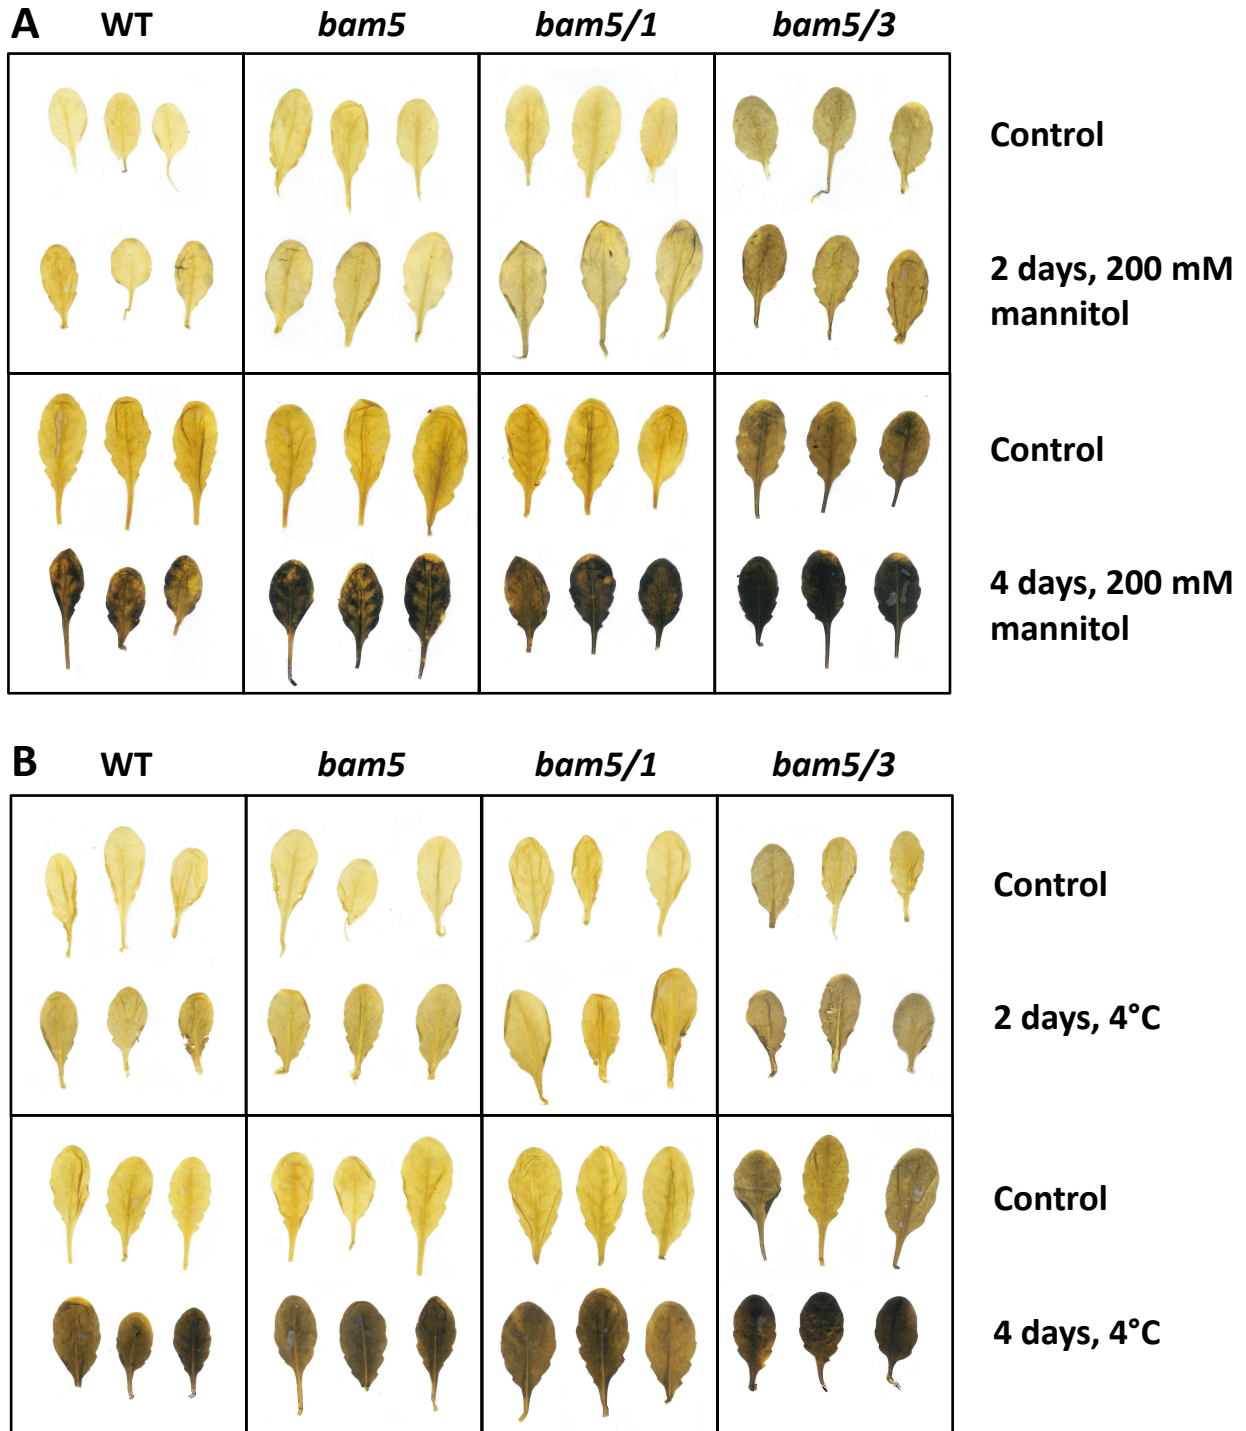

**Supplemental Figure S2.** Effect of osmotic stress or cold stress on starch levels in leaves of 5-week old wild type, *bam5*, *bam5/1*, or *bam5/3* Arabidopsis plants. Leaves were harvested at the start of the photoperiod and stained with iodine after 2 or 4 days of treatment. A, Plants were treated with 200 mL of nutrient solution (control) or nutrient solution containing 200 mM mannitol. B, Plants were incubated at 22°C (control) or 4°C under a 12/12 hr photoperiod. Representative leaves are shown.

**Supplemental Table SI.** List of primers used in PCR and RT-PCR reactions.

| Target Gene       | Locus     | Purpose                                          | Primer Sequence 5' to 3'   |
|-------------------|-----------|--------------------------------------------------|----------------------------|
| <i>BAM1</i>       | At3g23920 | T-DNA PCR,<br>T-DNA RT-PCR,<br>Transcript levels | TCAACCTCTTCAACAACCCAC      |
|                   |           |                                                  | CTCACGGAACAGATCCATCAC      |
| <i>BAM2</i>       | At4g00490 | T-DNA PCR                                        | TACAGACGCGACACATCTGAC      |
|                   |           |                                                  | CCAGCAGTCAACCATAACACC      |
|                   |           | T-DNA RT-PCR                                     | GGGAATTCATGGCGATTAGGTTGAAT |
|                   |           |                                                  | CCAGCAGTCAACCATAACACC      |
| <i>BAM3</i>       | At4g17090 | T-DNA PCR                                        | CGTGAATCACATCGAACACAC      |
|                   |           |                                                  | TTGTTGGAGGAACTTTCTTGG      |
|                   |           | T-DNA RT-PCR                                     | GGGAATTCATGGAATTGACACTGAAT |
|                   |           |                                                  | CAGGGTATGATGGGTATCTC       |
|                   |           | Transcript levels                                | GAGAGTTCCAGTGCTACGAC       |
|                   |           |                                                  | TCTCAGCGATCTTGCCTT         |
| <i>BAM5</i>       | At4g15210 | T-DNA PCR                                        | TCACACCAAATTTTTGACATCC     |
|                   |           |                                                  | CCCTTGTCTCCGTAAATTCAA      |
|                   |           | T-DNA RT-PCR                                     | GGGGATCCAATGGCTACCAATAC    |
|                   |           |                                                  | TTGGGGGTAAGAAGGATAAC       |
| <i>BAM6</i>       | At2g32290 | T-DNA PCR                                        | ATCGCACGATAACCATCTCTG      |
|                   |           | T-DNA RT-PCR                                     | TCGTTTCATAGATGTGGAGGC      |
| T-DNA primer LBc1 |           | T-DNA PCR                                        | AAAGAAAAACCACCCAGTACA      |
| <i>Cor78</i>      | At5g52310 | Cold stress control                              | CTTTGACTCTGTTCTCGGT        |
|                   |           |                                                  | GTTGTCAGTTTCTCCGCC         |
| <i>Hsp70</i>      | At3g12580 | Osmotic stress control                           | TCAAGCGGATAAGAGTCACT       |
|                   |           |                                                  | CTCGTCCGGGTTAATGCT         |
| <i>PP2A</i>       | At1g13320 | Internal Control                                 | AGACAGAGTTCCAAACATCA       |
|                   |           |                                                  | GAACCAAACACAATTCGTTG       |

**Supplemental Table SII.** List of reference sequence numbers for BAMs identified in nine eudicot genomes and used for generation of the phylogenetic tree shown in Supplemental Figure S1, those BAM1 and BAM3 orthologs used in the amino acid composition analysis, and the amino acids used in the analysis.

| <b>Species</b>              | <b>BAM protein</b>     | <b>Used for Composition</b> | <b>Amino acid numbers</b> |
|-----------------------------|------------------------|-----------------------------|---------------------------|
| <i>Arabidopsis thaliana</i> | NP_189034.1            | AtBAM1                      | 42-575                    |
|                             | NP_567523.1            | AtBAM3                      | 50-548                    |
|                             | NP_567460.1            |                             |                           |
|                             | NP_191958.3            |                             |                           |
|                             | NP_180788.2            |                             |                           |
|                             | NP_568829.2            |                             |                           |
|                             | NP_182112.2            |                             |                           |
|                             | NP_199343.1            |                             |                           |
|                             | NP_197368              |                             |                           |
| <i>Citrus sinensis</i>      | XP_006493994.1         | CisBAM1                     | 34-580                    |
|                             | XP_006477060.1         | CisBAM3                     | 43-551                    |
|                             | XP_006447463.1         |                             |                           |
|                             | XP_006476339.1         |                             |                           |
|                             | XP_006445046.1         |                             |                           |
|                             | XP_006491093.1         |                             |                           |
|                             | XP_006489160.1         |                             |                           |
|                             | XP_006432891.1         |                             |                           |
|                             | XP_006493994.1         |                             |                           |
|                             | XP_006477060.1         |                             |                           |
|                             | XP_006447463.1         |                             |                           |
|                             | XP_006476339.1         |                             |                           |
|                             | <i>Cucumis sativus</i> | XP_004134029.1              | CusBAM1                   |
| XP_004147196.1              |                        |                             |                           |
| XP_004147264.1              |                        | CusBAM3                     | 43-538                    |
| XP_004144400.1              |                        |                             |                           |
| XP_004144579.1              |                        |                             |                           |
| XP_004164639.1              |                        |                             |                           |
| XP_004138591.1              |                        |                             |                           |
| XP_004144975.1              |                        |                             |                           |
| XP_004150546.1              |                        |                             |                           |
| <i>Fragaria vesca</i>       | XP_004296549.1         | FvBAM1                      | 35-578                    |
|                             | XP_004300297.1         | FvBAM3                      | 43-553                    |
|                             | XP_004289151.1         |                             |                           |
|                             | XP_004301815.1         |                             |                           |
|                             | XP_004306786.1         |                             |                           |
|                             | XP_004291809.1         |                             |                           |
|                             | XP_004306787.1         |                             |                           |
|                             | XP_004296793.1         |                             |                           |
|                             | XP_004301812.1         |                             |                           |
|                             | XP_004301768.1         |                             |                           |
| <i>Glycine max</i>          | XP_003534086.1         | GmBAM1                      | 31-569                    |
|                             | XP_003548316.1         |                             |                           |

|                             |                         |                |        |
|-----------------------------|-------------------------|----------------|--------|
|                             | XP_006573703.1          |                |        |
|                             | NP_001236350.1          |                |        |
|                             | XP_003539125.1          |                |        |
|                             | XP_003524296.1          | GmBAM3         | 41-547 |
|                             | XP_003539882.1          |                |        |
|                             | NP_001236247.1          |                |        |
|                             | XP_003540325.2          |                |        |
|                             | XP_003532447.1          |                |        |
|                             | XP_003541934.2          |                |        |
|                             | XP_003525331.1          |                |        |
|                             | XP_003552392.1          |                |        |
|                             | XP_003534564.1          |                |        |
|                             | XP_003542915.1          |                |        |
|                             | NP_001236364.1          |                |        |
|                             | XP_003534334.1          |                |        |
|                             | XP_003516502.1          |                |        |
| <i>Populus trichocarpa</i>  | XP_002314522.2          | PtBAM1         | 33-586 |
|                             | XP_002311706.1          |                |        |
|                             | XP_006385389.1          | PtBAM3         | 41-547 |
|                             | XP_006385589.1          |                |        |
|                             | XP_002297961.1          |                |        |
|                             | XP_006372993.1          |                |        |
|                             | XP_002320794.2          |                |        |
|                             | XP_002302585.2          |                |        |
|                             | XP_002320793.2          |                |        |
|                             | XP_002312750.2          |                |        |
|                             | XP_002304400.1          |                |        |
|                             | <i>Ricinus communis</i> | XP_002518196.1 | RcBAM1 |
| XP_002517513.1              |                         | RcBAM3         | 41-547 |
| XP_002515712.1              |                         |                |        |
| XP_002511858.1              |                         |                |        |
| XP_002511857.1              |                         |                |        |
| XP_002516865.1              |                         |                |        |
| XP_002519919.1              |                         |                |        |
| <i>Solanum lycopersicum</i> | NP_001234556.1          | SIBAM1         | 35-580 |
|                             | XP_004244551.1          | SIBAM3         | 42-542 |
|                             | XP_004245844.1          |                |        |
|                             | XP_004245482.1          |                |        |
|                             | XP_004243448.1          |                |        |
|                             | XP_004229887.1          |                |        |
|                             | NP_001234052.1          |                |        |
|                             | XP_004244442.1          |                |        |
| <i>Vitis vineifera</i>      | XP_002285569.1          | VvBAM1         | 35-573 |
|                             | XP_002282871.1          | VvBAM3         | 42-543 |
|                             | XP_002263816.2          |                |        |
|                             | XP_002281003.1          |                |        |
|                             | XP_002274612.2          |                |        |
|                             | XP_002265698.1          |                |        |
|                             | XP_002273843.1          |                |        |
|                             | XP_002276777.1          |                |        |
|                             | XP_002270680.1          |                |        |
